# Supplementary material
Source: Elsevier journal article supplement (https://www.sciencedirect.com/science/article/pii/S0034709420303524)
Supplement: mmc1 [file S0034709420303524:mmc1.docx]

**Material Complementar** 1 Estratégia de busca para PubMed.

| #1　(“postoperative nausea and vomiting” [MeSH Terms] OR (“postoperative” [All Fields] AND “nausea” [All Fields] AND “vomiting” [All Fields]) OR “postoperative nausea and vomiting” [All Fields]) AND neurokinin1 [All Fields] AND (“Receptor” [Journal] OR “receptor” [All Fields]) AND antagonist [All Fields] |
| --- |
| #2　(“neurokinin1” [All Fields] OR “NK1” [All Fields]) AND (“Receptor” [Journal] OR “receptor” [All Fields]) AND antagonist [All Fields] |
| #3　“aprepitant” [MeSH Terms] OR “aprepitant” [All Fields] |
| #4　“fosaprepitant” [Supplementary Concept] OR “fosaprepitant” [All Fields]) |
| #5　“ondansetron” [MeSH Terms] OR “ondansetron” [All Fields] |
| #6　“receptors, serotonin, 5-HT3” [MeSH Terms] OR (“receptors” [All Fields] AND “serotonin” [All Fields] AND “5-HT3” [All Fields]) OR “5-HT3 serotonin receptors” [All Fields] OR (“5-HT3” [All Fields] AND “receptor” [All Fields]) OR “5-HT3 receptor” [All Fields]) AND antagonist [All Fields] |
| #7　#1 AND #2 |
| #8　#1 AND #3 |
| #9　#1 AND #4 |
| #10　#1 AND #5 |
| #11　#1 AND #6 |
| #12　#1 AND #2 AND #3 |
| #13　#1 AND #2 AND #4 |
| #14　#1 AND #2 AND #3 AND #4 |
| #15　#1 AND #2 AND #5 |
| #16　#1 AND #2 AND #6 |
| #17　#1 AND #3 AND #4 |
| #18　#1 AND #3 AND #5 |
| #19　#1 AND #3 AND #6 |
| #20　#1 AND #4 AND #5 |
| #21　#1 AND #4 AND #6 |
| #22　#1 AND #5 AND #6 |

**Material Complementar 2** Resumo da razão de chances (OR) e gráfico de funil para a incidência de vômito no pós-operatório na comparação de antagonistas do receptor NK-1 com antagonistas do receptor 5-HT3 no período de 0‒24 horas pós-operatórias.


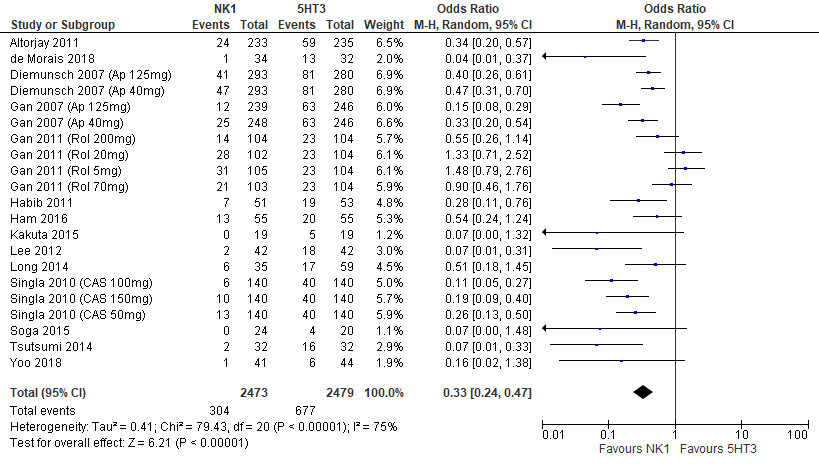


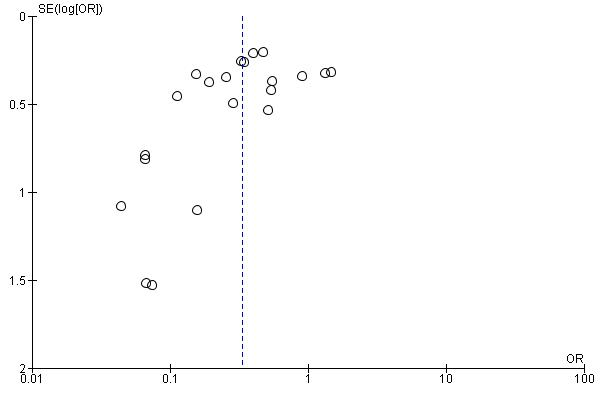


**Material Complementar 3** Resumo da razão de chances (OR) e gráfico de funil para a incidência de vômito no pós-operatório na comparação de antagonistas do receptor NK-1 com antagonistas do receptor 5-HT3 no período de 0‒48 horas pós-operatórias


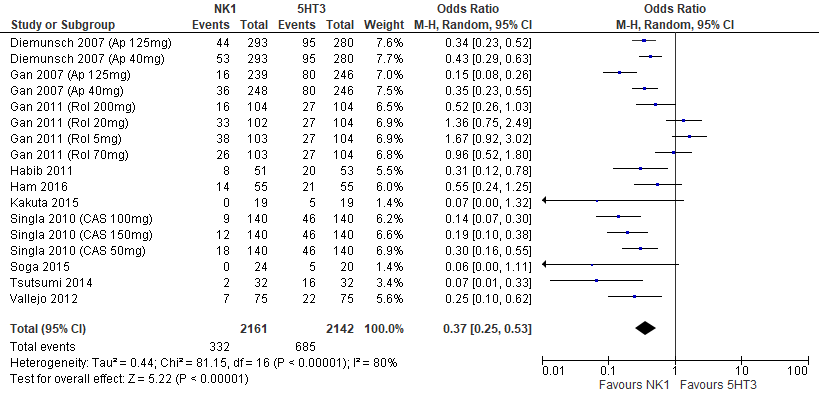


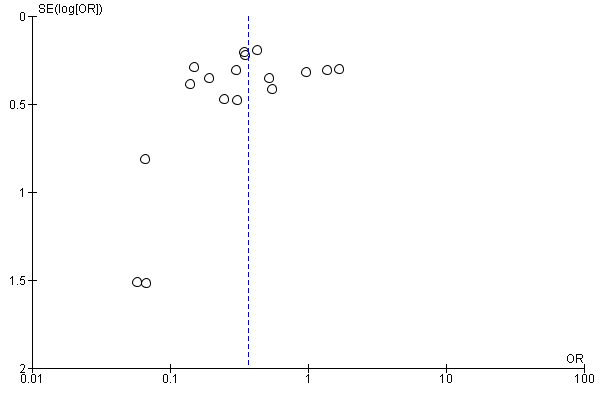


**Material Complementar 4** Gráficos de Funil para as figuras 3, 4, 5, e 6.

| **Figura 3** | **Figura 4** |
| --- | --- |
| 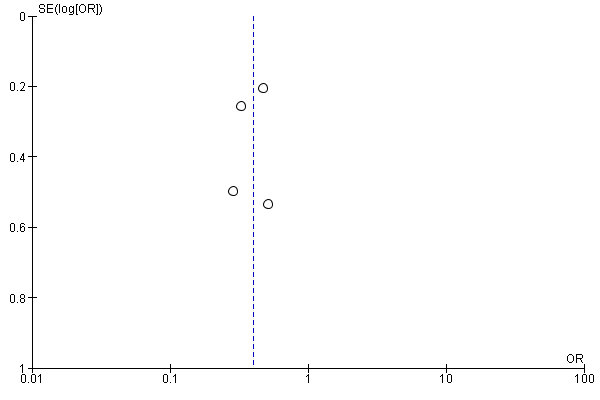 | 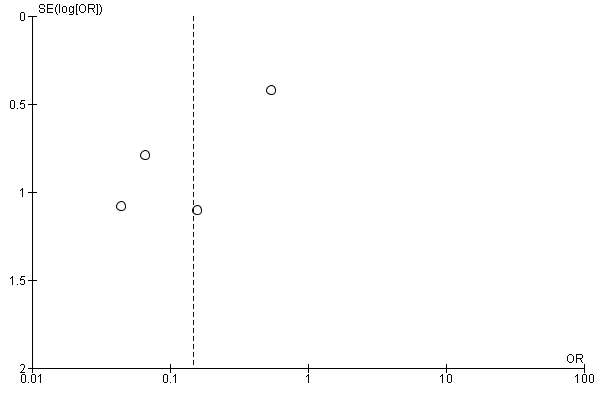 |
| **Figura 5** | **Figura 6** |
| 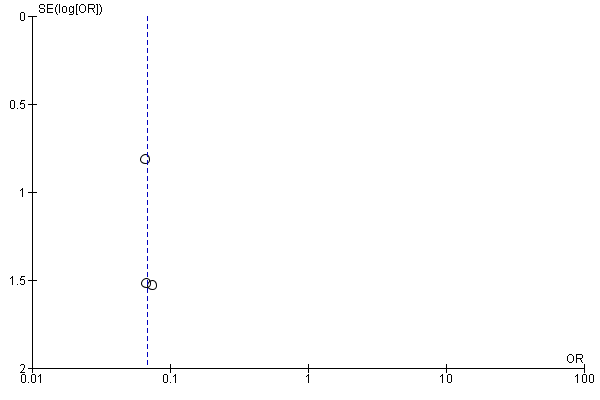 | 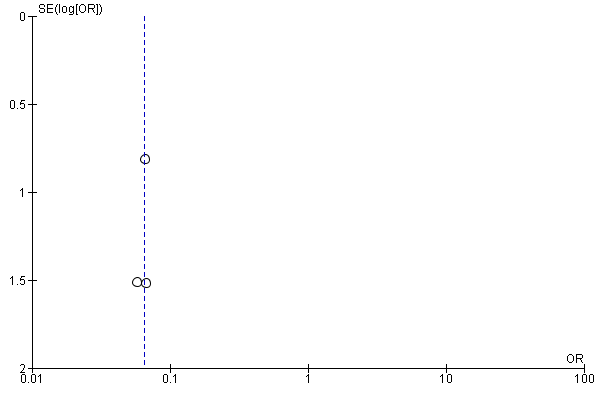 |

**Material Complementar 5** Resumo da razão de chances (OR) e gráfico de funil para a incidência de náusea e vômito no pós-operatório na comparação de antagonistas do receptor NK-1 com antagonistas do receptor 5-HT3 no período de 0‒24 horas pós-operatórias.


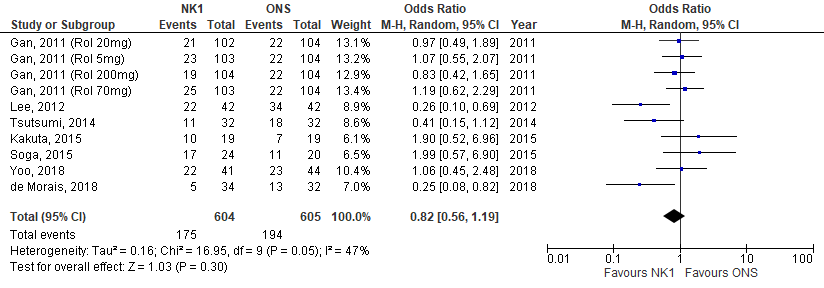


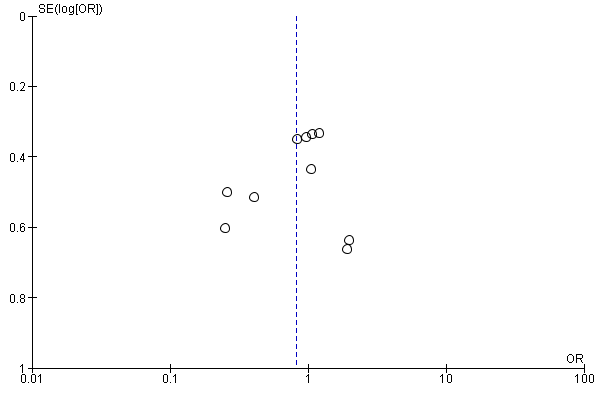


**Material Complementar 6** Resumo da razão de chances (OR) e gráfico de funil para a incidência de náusea e vômito no pós-operatório na comparação de antagonistas do receptor NK-1 com antagonistas do receptor 5-HT3 no período de 0‒48 horas pós-operatórias.


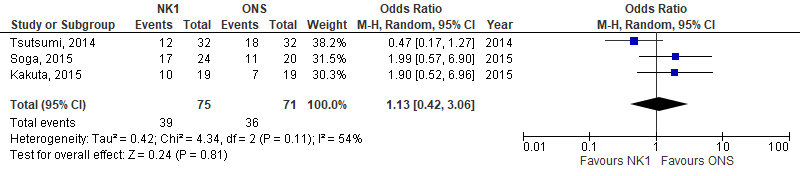


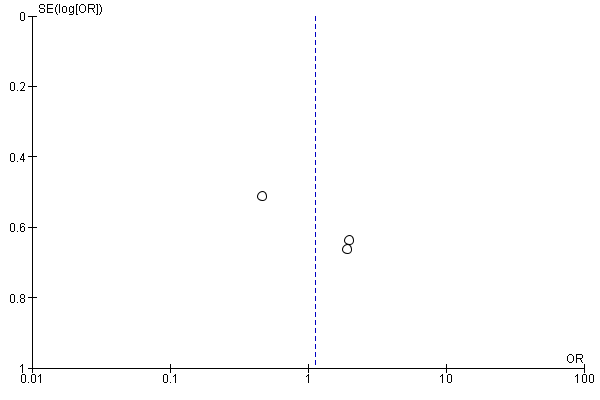


**Material Complementar 7** Eventos Adversos.

| **Estudos (Autor, Ano, País)** | **Eventos Adversos (grupo NK1 *vs.* grupo ONS )** |
| --- | --- |
| Yoo et al., 2018, Coréia | Não houve diferenças significantes entre os grupos. |
| Tontura: 11/41 (27%) *vs.* 12/44 (27%) (*p* = 1.000) |
| Cefaleia: 3/41 (7%) *vs.* 4/4 4 (9%) (*p* = 1.000) |
| de Morais et al., 2018, Brasil | Não houve diferenças significantes entre os grupos. |
| Hipotensão: 1/32 (3,1%) *vs*. 1/34 (2,9%) (*p* = 1.000) |
| Prurido: 10/32 (31,3%) *vs*. 7/34 (20,5%) (*p* = 0,40) |
| Ham et al., 2016, Coréia | Não houve diferenças significantes entre os grupos. |
| Cefaleia: 15/55 (27%) *vs*. 12/55 (22%) (*p* = 0,54) |
| Tontura: 37/55 (67%) *vs*. 28/55 (52%) (*p* = 0,10) |
| Sedação: 15/55 (27%) *vs*. 11/55 (20%) (*p* = 0,40) |
| Retardo na eliminação de gases: 28/55 (52%) *vs*. 24/55 (61%) (*p* = 0,29) |
| Prurido: 2/55 (4%) *vs*. 5/55 (9%) (*p* = 0,16) |
| Kakuta et al., 2015, Japão | N/A |
| Soga et al., 2015, Japão | N/A |
| Long et al., 2014, EUA | Diferencas não significantes entre os grupos |
| Shinha et al., 2014, EUA | N/A |
| Tsutsumi et al., 2014, Japão | N/A |
| Moon et al., 2014, Coréia | N/A |
| Lim et al., 2013, Coréia | Em todos os grupos, ausência de sintomas a serem considerados, particularmente como sendo sintomas de efeitos adversos |
| Vallejo et al., 2012, EUA | N/A |
| Altorjay et al., 2011, EUA | Obstipação: 17/235 (7,2%) *vs*. 8/237 (3,4%) |
| Flatulência: 11/235 (4,7%) *vs*. 12/237 (5,1%) |
| Hipotensão: 15/235 (6,4%) *vs*. 8/237 (3,4%) |
| Cefaleia: 8/235 (3,4%) *vs*. 11/237 (4,6%) |
| Prurido: 4/235 (1,7%) *vs*. 5/237 (2,1%) |
| Lee et al., 2012, Coréia | Não houve diferenças significantes entre os grupos. |
| Tontura: 8/42 (19,0%) *vs*. 10/42 (23,8%) (*p* = 0,595) |
| Cefaleia: 5/42 (11,9%) *vs*. 6/42 (14,3%) (*p* = 0,746) |
| Sedação: 1/42 (2,4%) *vs*. 2/42 (4,8%) (*p* = 0,557) |
| Gan et al., 2011, EUA | A incidência geral de eventos adversos não foi clinicamente significante em todos os grupos. |
| Habib et al., 2011, EUA | Não houve diferenças significantes entre os grupos nos escores de sedação ou na incidência de cefaléia. |
| Singla et al., 2010, EUA | A proporção de pacientes com evento adverso grave foi semelhante entre os grupos. |
| Diemunsch et al., 2007, EUA | Não houve eventos adversos graves fatais durante o estudo. |
| Gan et al., 2007, EUA | Não há diferenças significantes entre os grupos. |

N/A, Não se aplica.
